# Supplementary material
Source: Research Square preprint supplement (doi:10.21203/rs.3.rs-8647099/v1)
Supplement: Supplementary file 1 [file 2b9d5058b800526f0bcee50d.pdf]

**P16INK4a affects the malignant biological behavior of gallbladder cancer cells  
by regulating the Wnt/ $\beta$ -catenin pathway**

Wei Guo, Xu Guo<sup>1#</sup>, Yunlong Bai<sup>1#</sup>, Yamu Li<sup>1</sup>, Xiaoshuang Chen<sup>1\*</sup>

<sup>1</sup>Department of General Surgery, the First Affiliated Hospital of Henan University,  
Kaifeng 475000, China.

# Xu. Guo and Y. Bai contributed equally to this paper.

\* Corresponding authors:

Xiaoshuang Chen, E-mail address: kfcxs1987@163.com.

p16INK4a

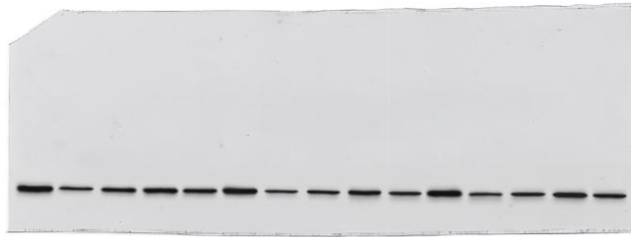

$\beta$ -actin

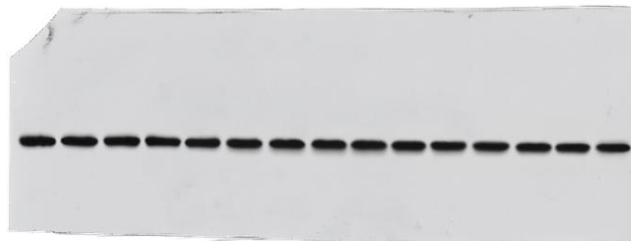

Figure S1. Western blot of p16INK4a protein expression in GBC cells.

p16INK4a

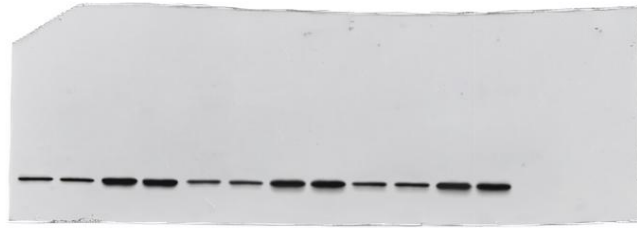

$\beta$ -actin

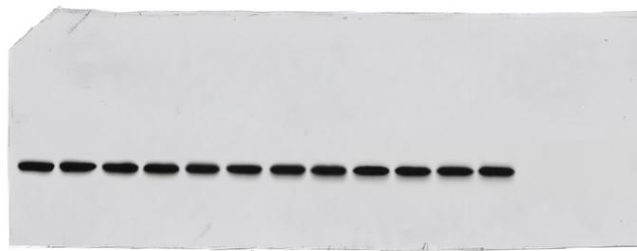

Figure S2. Western blot of p16INK4a protein expression in GBC-SD cells of each group.

c-Myc

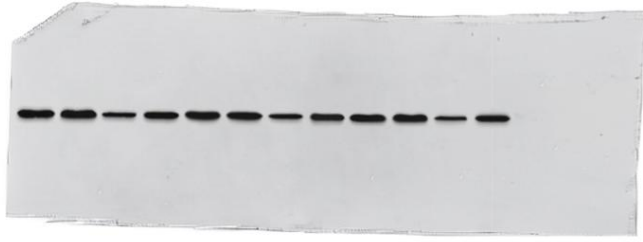

Cyclin D1

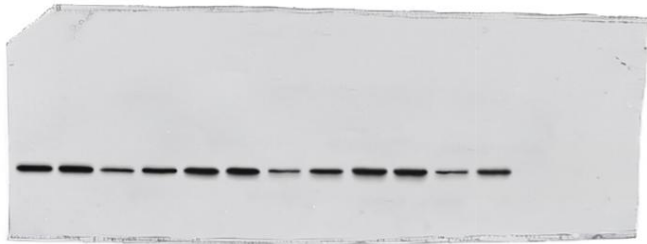

$\beta$ -actin

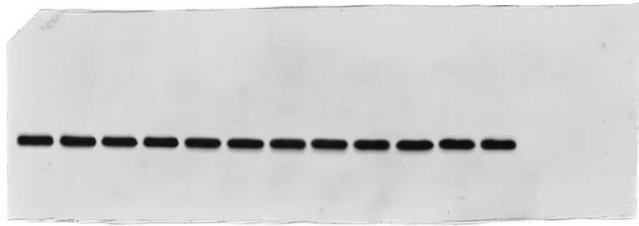

$\beta$ -catenin

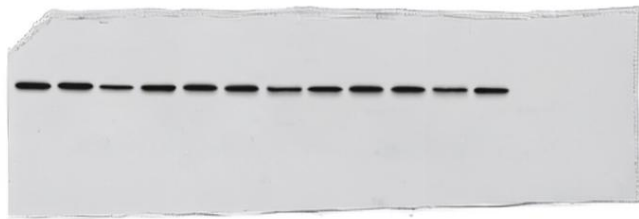

Figure S3. Western blot of  $\beta$ -catenin, c-Myc, Cyclin D1 protein expression in the GBC-SD cells in each group.
